# Supplementary material for: Identification of lactate dehydrogenase as a mammalian pyrroloquinoline quinone (PQQ)-binding protein
Source: PubMed Central journal article supplement (PMC4882622; doi:10.1038/srep26723), 2016-05-27
Supplement: srep26723-s1.pdf [file srep26723-s1.pdf]

## Supplementary Information

### **Identification of lactate dehydrogenase as a mammalian pyrroloquinoline quinone (PQQ)-binding protein**

Mitsugu Akagawa<sup>1</sup>, Kenji Minematsu<sup>1</sup>, Takahiro Shibata<sup>2,3</sup>, Tatsuhiko Kondo<sup>2</sup>, Takeshi Ishii<sup>4</sup> & Koji Uchida<sup>2</sup>

<sup>1</sup> Department of Biological Chemistry, Division of Applied Life Science, Graduate School of Life and Environmental Sciences, Osaka Prefecture University, Sakai 599-8531, Japan

<sup>2</sup> Graduate School of Bioagricultural Sciences, Nagoya University, Nagoya 464-8601, Japan

<sup>3</sup> PRESTO, Japan Science and Technology Agency (JST), Kawaguchi, Saitama 332-0012, Japan

<sup>4</sup> Faculty of Nutrition, Kobe Gakuin University, Kobe, Hyogo 651-8586, Japan

E-mail: akagawa@biochem.osakafu-u.ac.jp (M.A.) or uchidak@agr.nagoya-u.ac.jp (K.U.)

## Supplementary Figure S1

|        |     |                                                              |
|--------|-----|--------------------------------------------------------------|
| Mouse  | 1   | ATLKDQLIYNLLKEEQAPQNKITVVGAVGMACAISILMKDLADELALVDVMEDKLLKG   |
| Rabbit | 1   | AALKDQLIHNLLKEEHVPQNKITVVGAVGMACAISILMKDLADELALVDVMEDKLLKG   |
| Human  | 1   | ATLKDQLIYNLLKEEQTPQNKITVVGAVGMACAISILMKDLADELALVDVIEDKLLKG   |
|        |     |                                                              |
| Mouse  | 61  | EMMDLQHGSFLRTPKIVSSKDYCVTANSKLVIIITAGARQQEGESRLNLVQRNVNIFKFI |
| Rabbit | 61  | EMMDLQHGSFLRTPKIVSGKDYSVTANSKLVIIITAGARQQEGESRLNLVQRNVNIFKFI |
| Human  | 61  | EMMDLQHGSFLRTPKIVSGKDYVVTANSKLVIIITAGARQQEGESRLNLVQRNVNIFKFI |
| △      |     |                                                              |
| Mouse  | 121 | IPNIVKYSPHCKLLIVSNPVDILTYVAWKISGFPKNRVIGSGCNLDSARFRYLMGERLGV |
| Rabbit | 121 | IPNVVKYSPHCKLLVSNPVDILTYVAWKISGFPKNRVIGSGCNLDSARFRYLMGERLGV  |
| Human  | 121 | IPNVVKYSPNCKLLIVSNPVDILTYVAWKISGFPKNRVIGSGCNLDSARFRYLMGERLGV |
| △      |     |                                                              |
| Mouse  | 181 | HALSCHGWVIGEHDSSVPVWSGMNVAGVSLKSLNPELGTADKEQWKEVHKQVVD SAYE  |
| Rabbit | 181 | HALSCHGWIIGEHDSSVPVWSGMNVAGVSLKTLHPDLGTADKEQWQVHKQVVD SAYE   |
| Human  | 181 | HPLSCHGWVIGEHDSSVPVWSGMNVAGVSLKTLHPDLGTDKDKQWKEVHKQVVD SAYE  |
|        |     |                                                              |
| Mouse  | 241 | VIKLGYSWATGLSVADLAESIMKNLRRVHPVSTMIKGLYGINEDVFLSVPCILGQNGIS  |
| Rabbit | 241 | VIKLGYSWATGLSVADLAESIMKNLRRVHPVSTMLKGLYGIKEDVFLSVPCILGQNGIS  |
| Human  | 241 | VIKLGYSWATGLSVADLAESIMKNLRRVHPVSTMIKGLYGIKDDVFLSVPCILGQNGIS  |
|        |     |                                                              |
| Mouse  | 301 | DVVKVTLTPEEEARLKKSAADTLWGIQKELQF                             |
| Rabbit | 301 | DVVKVTLTSEEEAHLKKSAADTLWGIQKELQF                             |
| Human  | 301 | DLVKVTLTSEEEARLKKSAADTLWGIQKELQF                             |

**Fig. S1. Alignment of the amino acid sequences of LDH-A of mouse, rabbit, and human<sup>1</sup>.** Perfect matches are enclosed in boxes with a black background. The open arrowheads indicate the position of the proposed residues involved in PQQ binding.

Supplementary Figure S2

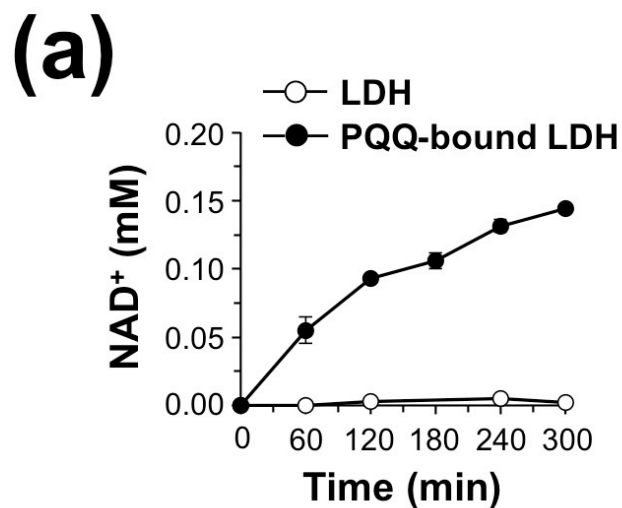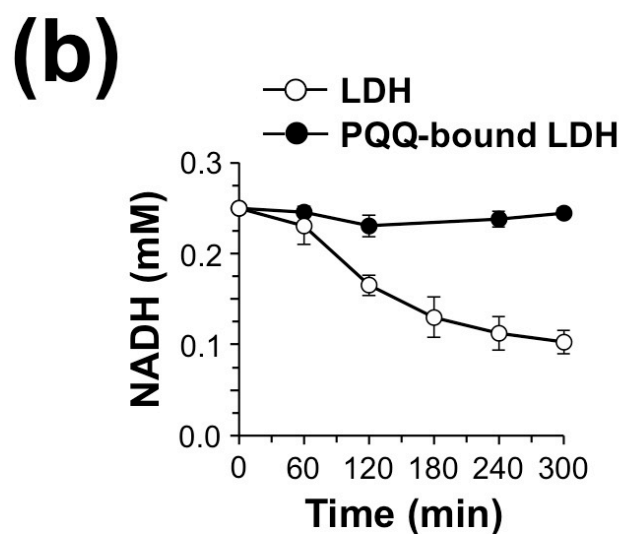

**Fig. S2. Time course of  $\text{NAD}^+$  formation by PQQ-bound LDH in the presence of NADH.** Rabbit muscle LDH (600 nM) and PQQ-bound LDH (600 nM) were incubated with 0.25 mM NADH at 37 °C for the indicated time. Then, concentrations of  $\text{NAD}^+$  (a) and NADH (b) in the reaction mixtures were determined by HPLC. The results shown are means  $\pm$  SE ( $n = 3$ ).
